# Supplementary material
Source: MDPI journal article supplement (https://www.mdpi.com/2311-5637/10/3/170)
Supplement: s1 [file s1]

**A**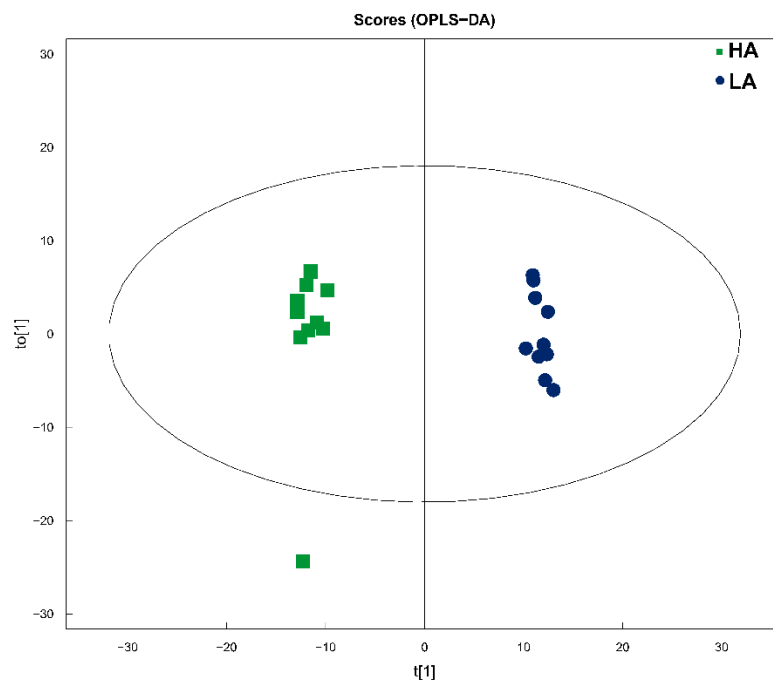**B**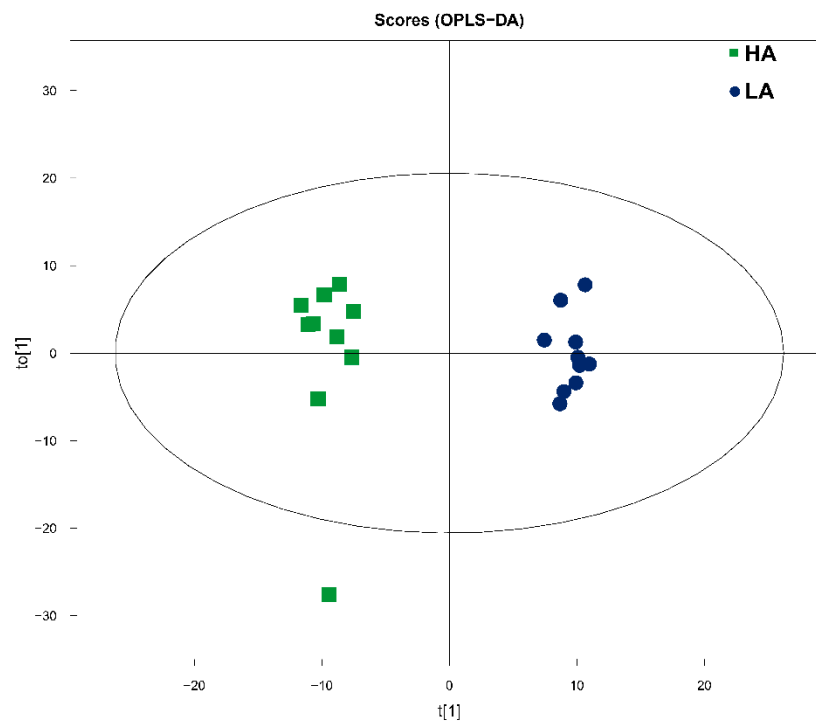

Supplementary Figure S1. The OPLS-DA model were derived from the liquid chromatography/mass spectrometry metabolomics profiles of Sanhe heifer rumen fluid samples from based on all identified metabolite features of rumen fluid samples from the two groups. [(A) negative mode; (B) positive mode].
